# Supplementary material for: Functionalized polycarbonates from dihydroxyacetone: insights into the immortal ring-opening polymerization of 2,2-dimethoxytrimethylene carbonate
Source: Royal Society of Chemistry journal article supplement (doi:10.1039/c1py00405k), 2011-01-01
Supplement: c1py00405k.pdf [file c1py00405k.pdf]

## Supporting Information

**Figure S1.**  $^1\text{H}$  NMR (200 MHz,  $\text{CDCl}_3$ , 23 °C) spectrum of  $\text{TMC}(\text{OMe})_2$ .

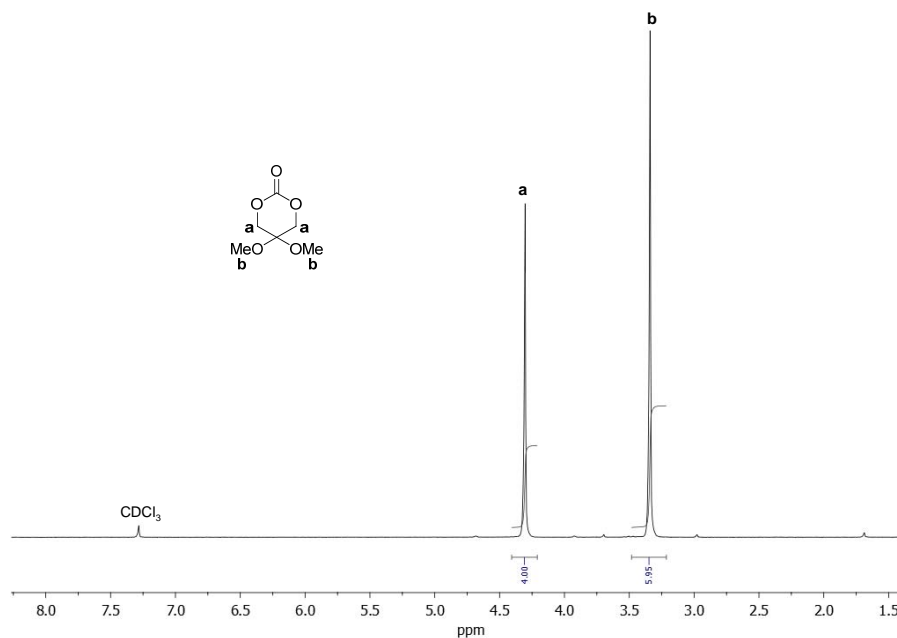

**Figure S2.**  $^{13}\text{C}$  NMR (50 MHz,  $\text{CDCl}_3$ , 23 °C) spectrum of  $\text{TMC}(\text{OMe})_2$ .

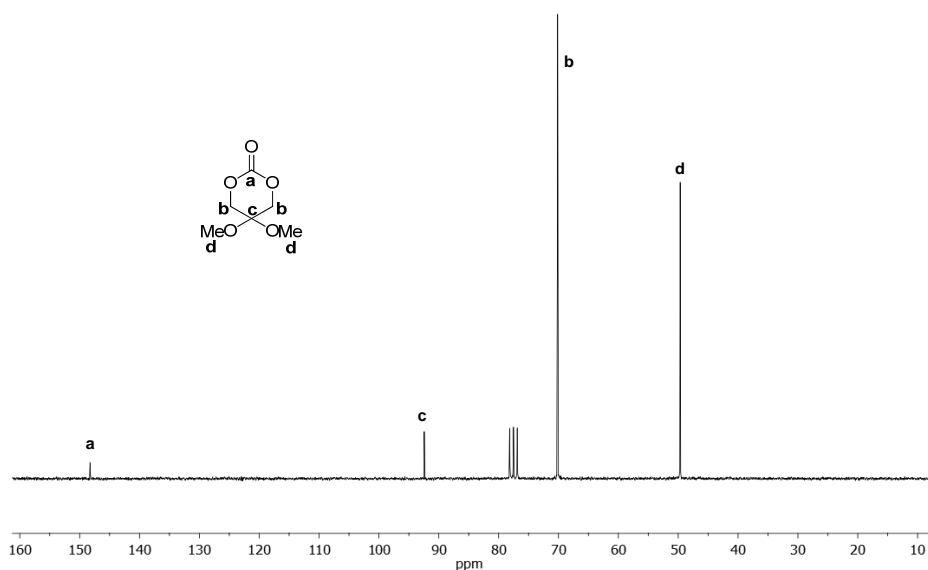

### NMR Data of H-P(TMC(OMe)<sub>2</sub>)-OBn

<sup>1</sup>H NMR (500 MHz, CDCl<sub>3</sub>) δ 7.39 (m, 5H, C<sub>6</sub>H<sub>5</sub>), 5.19 (s, 2H, C<sub>6</sub>H<sub>5</sub>CH<sub>2</sub>), 4.24 (s, (4n+2)H, ({C(O)OCH<sub>2</sub>C(OCH<sub>3</sub>)<sub>2</sub>CH<sub>2</sub>}; CH<sub>2</sub>C(OCH<sub>3</sub>)<sub>2</sub>CH<sub>2</sub>OH)), 3.87 (s, 2H, HOCH<sub>2</sub>C(CH<sub>3</sub>)<sub>2</sub>CH<sub>2</sub>), 3.30 (s, (6n+6)H, {C(O)OCH<sub>2</sub>C(OCH<sub>3</sub>)<sub>2</sub>CH<sub>2</sub>}, HOCH<sub>2</sub>C(CH<sub>3</sub>)<sub>2</sub>CH<sub>2</sub>). <sup>13</sup>C{<sup>1</sup>H} NMR (50 MHz, CDCl<sub>3</sub>) δ 155.3 ({C(O)OCH<sub>2</sub>C(OCH<sub>3</sub>)<sub>2</sub>CH<sub>2</sub>}), 138.9 (C<sub>6ortho</sub>H<sub>5</sub>), 129.0 (C<sub>6meta</sub>H<sub>5</sub>), 128.1 (C<sub>6para</sub>H<sub>5</sub>), 102.3 (HOCH<sub>2</sub>C(OCH<sub>3</sub>)<sub>2</sub>CH<sub>2</sub>OC(O)), 99.8 ({C(O)OCH<sub>2</sub>C(OCH<sub>3</sub>)<sub>2</sub>CH<sub>2</sub>}), 72.7 (PhCH<sub>2</sub>OC(O)), 67.9 ({C(O)OCH<sub>2</sub>C(OCH<sub>3</sub>)<sub>2</sub>CH<sub>2</sub>}), 51.0({C(O)OCH<sub>2</sub>C(OCH<sub>3</sub>)<sub>2</sub>CH<sub>2</sub>}).

### NMR Data of H-P(TMC(OMe)<sub>2</sub>)-H

<sup>1</sup>H NMR (500 MHz, CDCl<sub>3</sub>) δ 4.24 (s, (4n+4)H, ({C(O)OCH<sub>2</sub>C(OCH<sub>3</sub>)<sub>2</sub>CH<sub>2</sub>}, HOCH<sub>2</sub>C(OCH<sub>3</sub>)<sub>2</sub>CH<sub>2</sub>), 3.78 (m, 4H, (OCH<sub>2</sub>CH<sub>2</sub>CH<sub>2</sub>O)), 3.63 (s, 4H, (HOCH<sub>2</sub>C(OCH<sub>3</sub>)<sub>2</sub>CH<sub>2</sub>), 3.31 (s, (6n+6)H, {C(O)OCH<sub>2</sub>C(OCH<sub>3</sub>)<sub>2</sub>CH<sub>2</sub>}, HOCH<sub>2</sub>C(OCH<sub>3</sub>)<sub>2</sub>CH<sub>2</sub>), 1.88 (m, 2H, (OCH<sub>2</sub>CH<sub>2</sub>CH<sub>2</sub>O)). <sup>13</sup>C{<sup>1</sup>H} NMR (50 MHz, CDCl<sub>3</sub>) δ 155.2 ({C(O)OCH<sub>2</sub>C(OCH<sub>3</sub>)<sub>2</sub>CH<sub>2</sub>}), 102.6 (HOCH<sub>2</sub>C(OCH<sub>3</sub>)<sub>2</sub>CH<sub>2</sub>), 99.8 ({C(O)OCH<sub>2</sub>C(OCH<sub>3</sub>)<sub>2</sub>CH<sub>2</sub>}), 69.0 ({C(O)OCH<sub>2</sub>C(OCH<sub>3</sub>)<sub>2</sub>CH<sub>2</sub>}), 63.3 (OCH<sub>2</sub>CH<sub>2</sub>CH<sub>2</sub>O), 50.8 ({C(O)OCH<sub>2</sub>C(OCH<sub>3</sub>)<sub>2</sub>CH<sub>2</sub>}), 26.9 (OCH<sub>2</sub>CH<sub>2</sub>CH<sub>2</sub>O).

**Figure S3.** MALDI-ToF mass spectrum of a H-PTMC(OMe)<sub>2</sub>-OBn sample ( $\overline{M}_n$  SEC = 3 130 g.mol<sup>-1</sup>; Table 1, entry 7).**Error! Bookmark not defined.**<sup>e</sup>

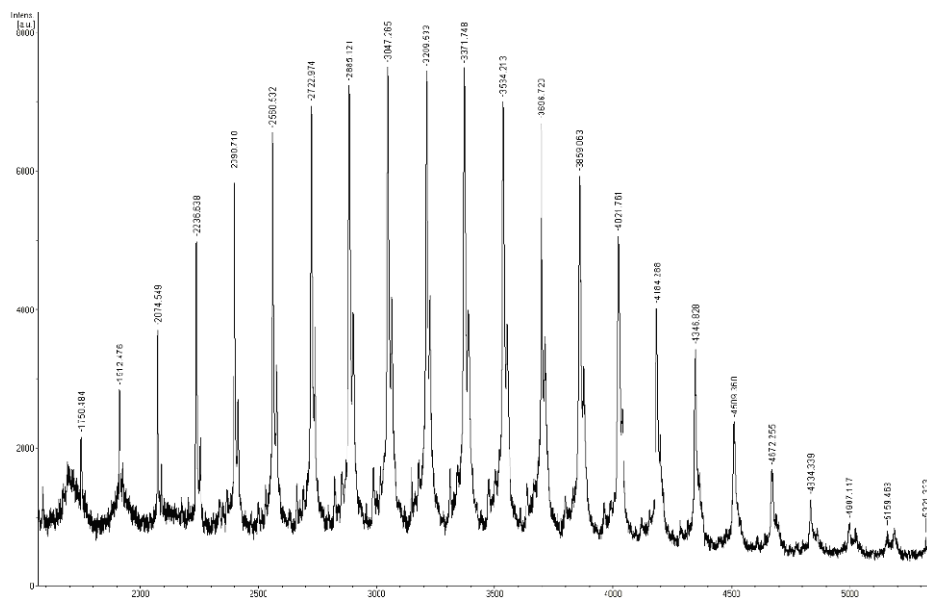

The most intense signal detected,  $m/z$ : 3209.5 g.mol<sup>-1</sup>, corresponds to the sodium species H-[TMC(OMe)<sub>2</sub>]<sub>19</sub>-OCH<sub>2</sub>Ph.Na<sup>+</sup> containing 19 monomer units (calculated isotopic mass for <sup>12</sup>C<sub>121</sub><sup>1</sup>H<sub>198</sub><sup>23</sup>Na<sub>1</sub><sup>16</sup>O<sub>96</sub>: 3 210 g.mol<sup>-1</sup>) and benzyloxy and hydroxyl end groups. The minor second distribution ( $m/z$ : [M+Na]<sup>+</sup> + 16 = [M+K]<sup>+</sup>) corresponds to the analogous H-P(TMC(OMe)<sub>2</sub>)-OCH<sub>2</sub>Ph.K<sup>+</sup> series with a similar repeat unit.

**Table S1.** Thermal properties of the polycarbonates

|                              | $\bar{M}_n^a$<br>(g.mol <sup>-1</sup> ) | $T_g^b$<br>(°C) | $T_d^c$<br>(°C) |
|------------------------------|-----------------------------------------|-----------------|-----------------|
| <b>PTMCErrror!</b>           |                                         |                 |                 |
| <b>Bookmark not defined.</b> | 8 100-457 000                           | -15/-20         | + 230           |
| P(TMC(OMe) <sub>2</sub> )    | 38 800                                  | 39              | 225             |

<sup>[a]</sup> Molar mass value determined by SEC. <sup>[b]</sup> Glass transition temperature determined by DSC. <sup>[c]</sup> Degradation temperature determined by TGA.
